# Supplementary material for: Endoscopic ultrasound-guided gastroenterostomy for the management of gastric outlet obstruction: A large comparative study with long-term follow-up
Source: PubMed Central journal article supplement — Endosc Int Open. 2023 Jan 13;11(1):E60–6. doi: 10.1055/a-1976-2279 (PMC9839427; doi:10.1055/a-1976-2279), 2023-01-13
Supplement: 2755supmat_10-1055-a-1976-2279.pdf [file 2755supmat_10-1055-a-1976-2279.pdf]

## Supplementary material

**Supplementary Table 1** Treatment outcomes and adverse events of malignant etiology

|                                                 | EUS-GE<br>(n=196)        | Enteral<br>stenting<br>(n=126) | Surgical-<br>GE (n=43) | Overall P-<br>value | P-value EUS-<br>GE vs. enteral<br>stenting ¶ | P-value EUS-<br>GE vs.<br>surgical-GE ¶ |
|-------------------------------------------------|--------------------------|--------------------------------|------------------------|---------------------|----------------------------------------------|-----------------------------------------|
| Technical success (N,<br>%)                     | 192 (98.0)               | 125 (99.2)                     | 43 (100.0)             | 0.82                | 0.65                                         | 1.00                                    |
| Clinical success (N,<br>%)                      | 192 (98.0)               | 116 (92.1)                     | 39 (90.7)              | 0.01*               | 0.01*                                        | 0.04                                    |
| Length of hospital stay<br>(days, median [IQR]) | 2 (1-3)                  | 3 (1-9.25)                     | 6 (3-9)                | <0.0001             | <0.0001*                                     | <0.0001*                                |
| Rate of re-intervention<br>(N, %)               | 1 (0.5)                  | 14 (11.1)                      | 5 (11.6)               | <0.0001             | <0.0001*                                     | <0.0001*                                |
| Duration of follow-up<br>(days, median [IQR])   | 202<br>(86.75-<br>370.5) | 56 (22.75-<br>208)             | 154 (43-<br>477)       | <0.0001             | <0.0001*                                     | 0.67                                    |
| AEs, N (%)                                      | 18 (9.2)                 | 50 (39.7)                      | 12 (27.9)              | < 0.0001            | < 0.0001*                                    | < 0.0001*                               |

P-value of less than 0.0167 indicates statistical significance based on a Bonferroni correction and \* indicates statistical significance. **Abbreviations:** AE: adverse event; ES: enteral stenting; EUS-GE: endoscopic ultrasound-guided gastroenterostomy; surgical-GE: surgical gastroenterostomy
